# Supplementary material for: Free-radical gases on two-dimensional transition-metal disulfides (XS2, X = Mo/W): robust half-metallicity for efficient nitrogen oxide sensors
Source: publisher site journal article supplement (doi:10.3762/bjnano.9.156), 2018-06-05
Supplement: Additional file 1 [file 2190-4286-9-156-S1.pdf]

# **Supporting Information**

for

## **Free-radical gases on two-dimensional transition-metal disulfides ( $\text{XS}_2$ , $\text{X} = \text{Mo/W}$ ): robust half-metallicity for efficient nitrogen oxide sensors**

Chunmei Zhang, Yalong Jiao, Fengxian Ma, Sri Kasi Matta, Steven Bottle and Aijun Du\*

Address: School of Chemistry, Physics and Mechanical Engineering, Queensland University of Technology, Gardens Point Campus, QLD 4001, Brisbane, Australia

Email: Aijun Du\* - aijun.du@qut.edu.au

\* Corresponding author

### **Additional computational data**

## Method

The spin-polarized structural relaxation and electronic property calculations were carried out using density functional theory (DFT) with the Perdew–Burke–Ernzerhof (PBE) generalized gradient approximation [1] exchange–correlation potential as implemented in the Vienna ab initio simulation package (VASP) [2-4]. A dispersion correction of the total energy (DFT-D3 method) [5] was used to incorporate the long-range van der Waals interactions. In addition to MoS<sub>2</sub>, and WS<sub>2</sub>, we expand our 2D material to GaS, GaSe, SnS, SnSe, WSe and Bi<sub>2</sub>Se<sub>3</sub> (Figure S1). A cut-off energy of 500 eV for the plane-wave basis set and a Monkhorst–Pack mesh [6] of  $7 \times 7 \times 1$  for the unit cell,  $3 \times 3 \times 1$  for the  $3 \times 3$  supercell, and  $3 \times 3 \times 1$  for the  $6 \times 6$  supercell for the Brillouin zone integration are employed to find the most favorable adsorption sites for NO and NO<sub>2</sub>. For simplicity, only the PDOS of a single NO gas adsorption on unit cell surface is given in Figure S1. The unit cell for a single NO<sub>2</sub> adsorption is not incorporated in order to guarantee a certain distance between two neighbouring NO<sub>2</sub> molecules (Figure S2).

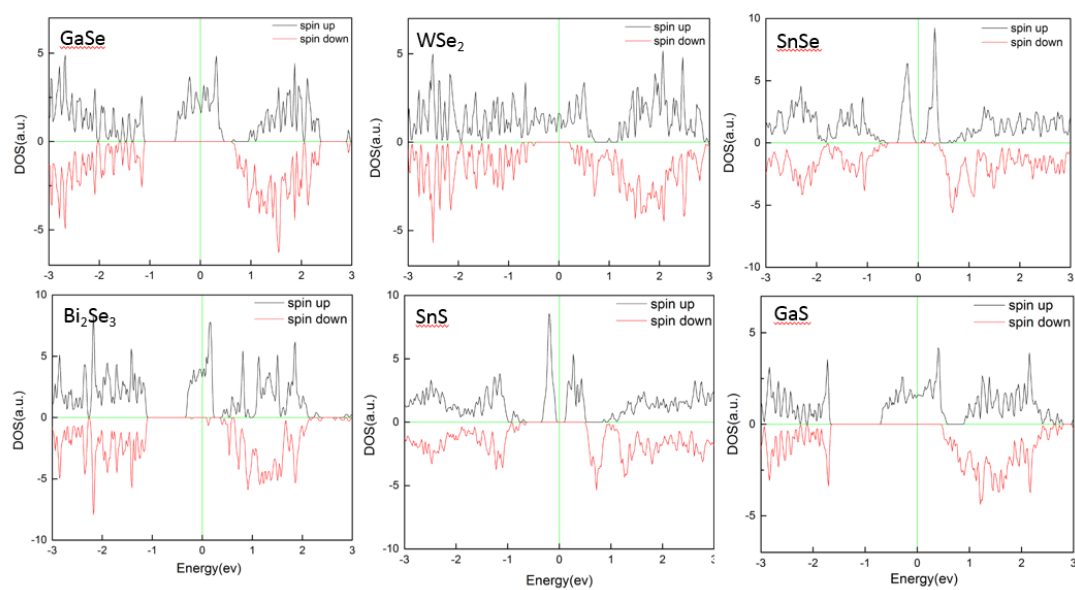

**Figure S1:** Total density of states (DOS) of NO adsorbed GaSe, WSe<sub>2</sub>, SnSe, Bi<sub>2</sub>Se<sub>3</sub>, SnS and GaS. The Fermi level is indicated by the green line.

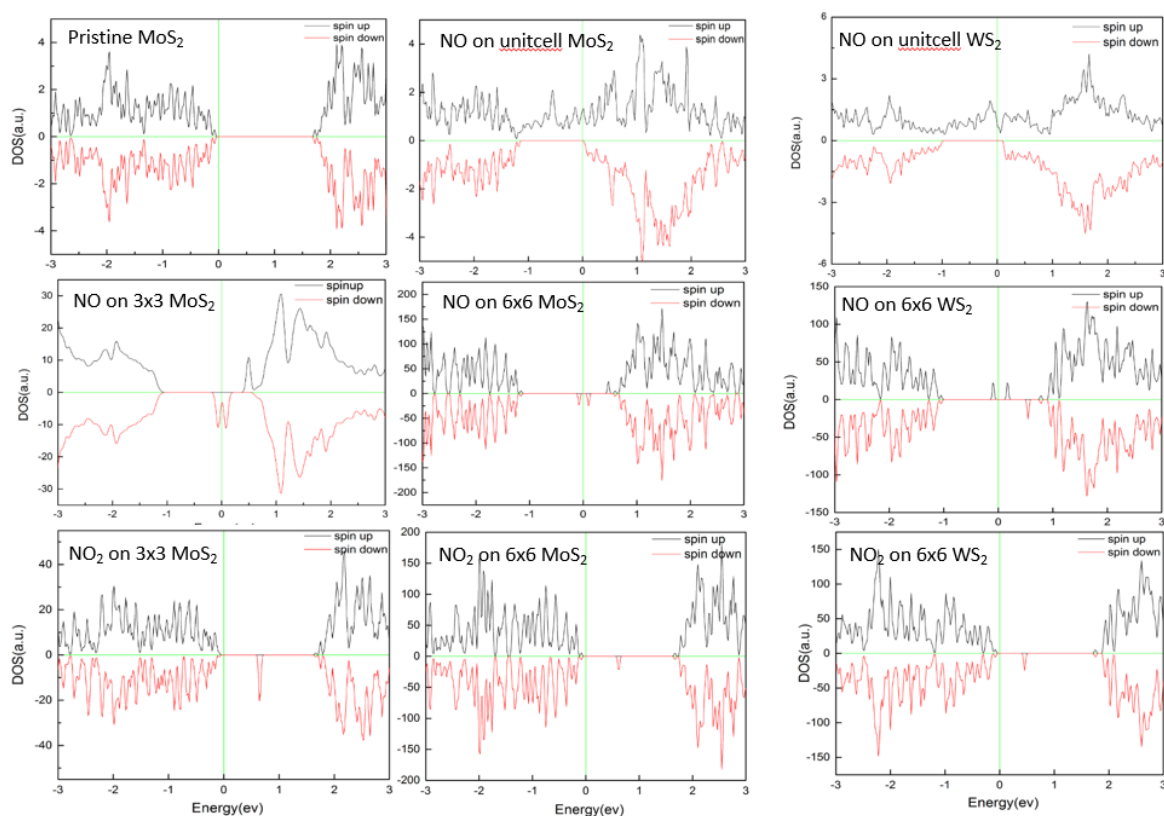

**Figure S2:** Total density of states (DOS) of the pristine 2D MoS<sub>2</sub> unit cell, 3 × 3 supercell and 6 × 6 MoS<sub>2</sub> supercell and with and with NO<sub>x</sub> (x = 1, 2) adsorbed. The Fermi level is indicated by the green line.

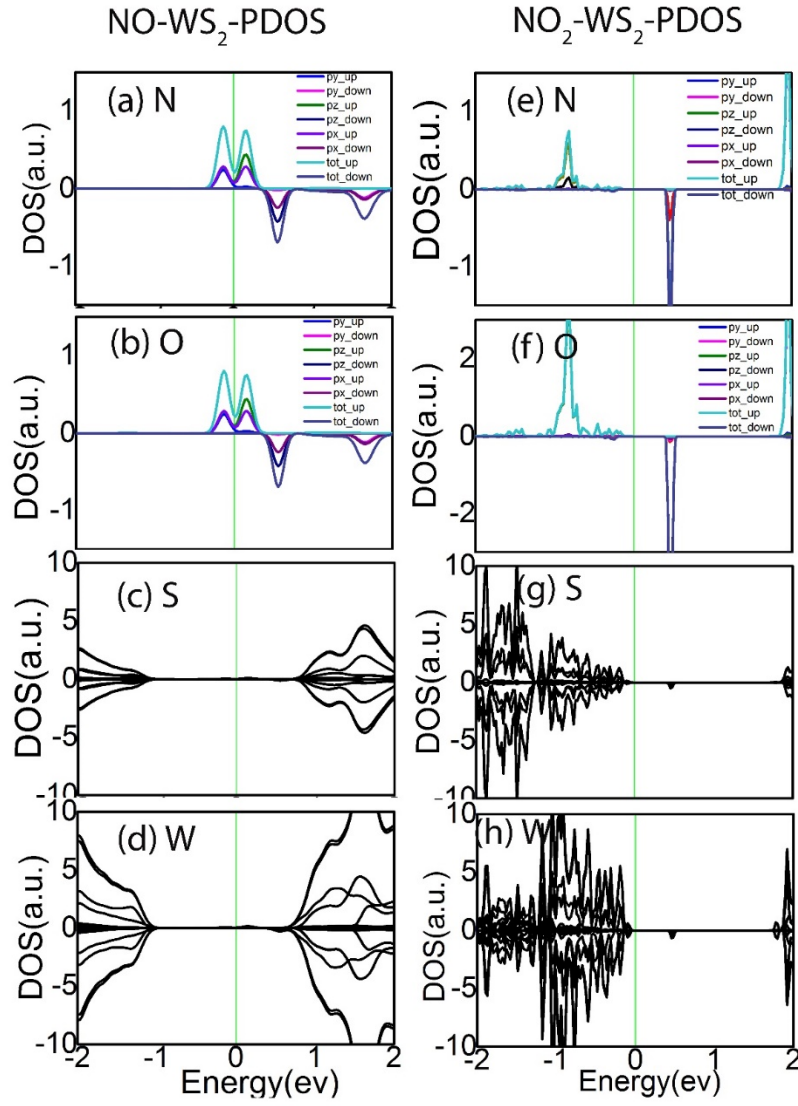

**Figure S3:** The N, O, W and S PDOS of WS<sub>2</sub> with (a–d) adsorbed NO and with (e–h) adsorbed NO<sub>2</sub>. The Fermi level is indicated by the green line.

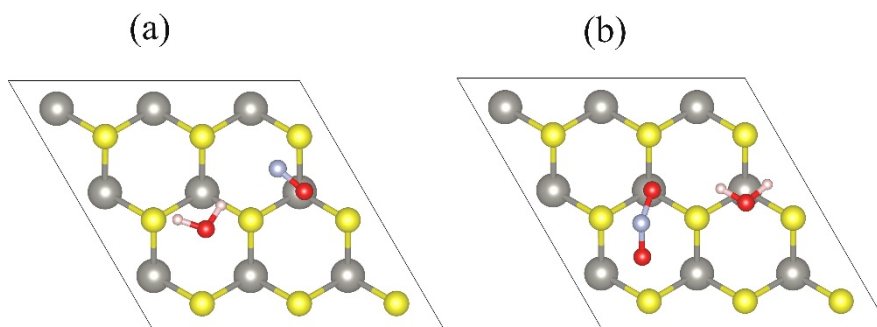

**Figure S4:** WS<sub>2</sub> with (a) adsorbed NO and with (b) adsorbed NO<sub>2</sub> in humid environment. The white, red, yellow, grey, dark grey balls represent H, O, S, N, W atoms, respectively.

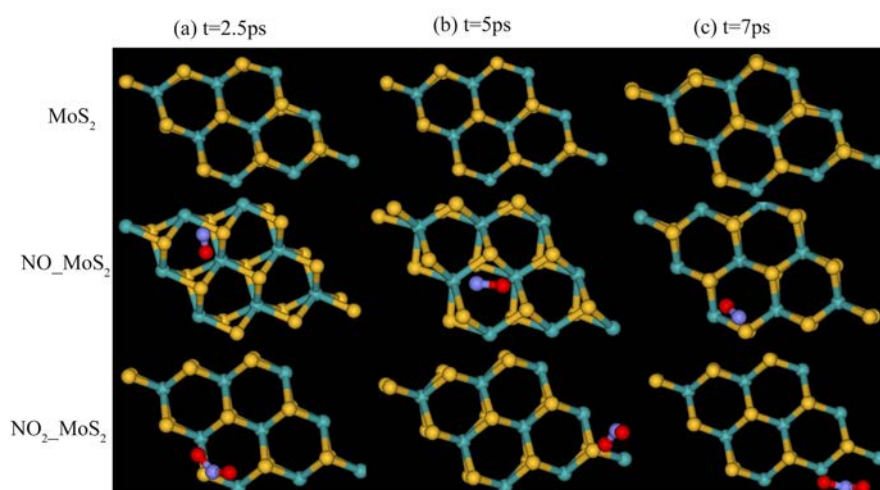

**Figure S5:** The thermodynamic stability at 300 K of MoS<sub>2</sub> monolayer, NO adsorbed MoS<sub>2</sub> (NO\_MoS<sub>2</sub>) and NO<sub>2</sub> adsorbed MoS<sub>2</sub> (NO<sub>2</sub>\_MoS<sub>2</sub>) are evaluated through ab initio molecular dynamics (AIMD) simulations. The figures present configurations after (a) 2.5 ps, (b) 5 ps, and (c) 7 ps.

## References

1. Perdew, J. P.; Burke, K.; Ernzerhof, M. *Phys. Rev. Lett.* **1996**, *77*, 3865–3868.  
doi:10.1103/PhysRevLett.77.3865
2. Kresse, G.; Furthmüller, J. *Phys. Rev. B* **1996**, *54*, 11169.  
doi:10.1103/PhysRevB.54.11169
3. Kresse, G.; Furthmüller, J. *Comput. Mater. Sci.* **1996**, *6*, 15–50.  
doi:10.1016/0927-0256(96)00008-0
4. Blöchl, P. E. *Phys. Rev. B* **1994**, *50*, 17953. doi:10.1103/PhysRevB.50.17953
5. Grimme, S. *J. Comput. Chem.* **2006**, *27*, 1787–1799. doi:10.1002/jcc.20495
6. Monkhorst, H. J.; Pack, J. D. *Phys. Rev. B* **1976**, *13*, 5188–5192.  
doi:10.1103/PhysRevB.13.5188
